# Supplementary material
Source: Springer Nature journal article supplement (https://www.springermedizin.de/resource/supplementary/12936_2009_891_MOESM15_ESM.pdf/9548478)

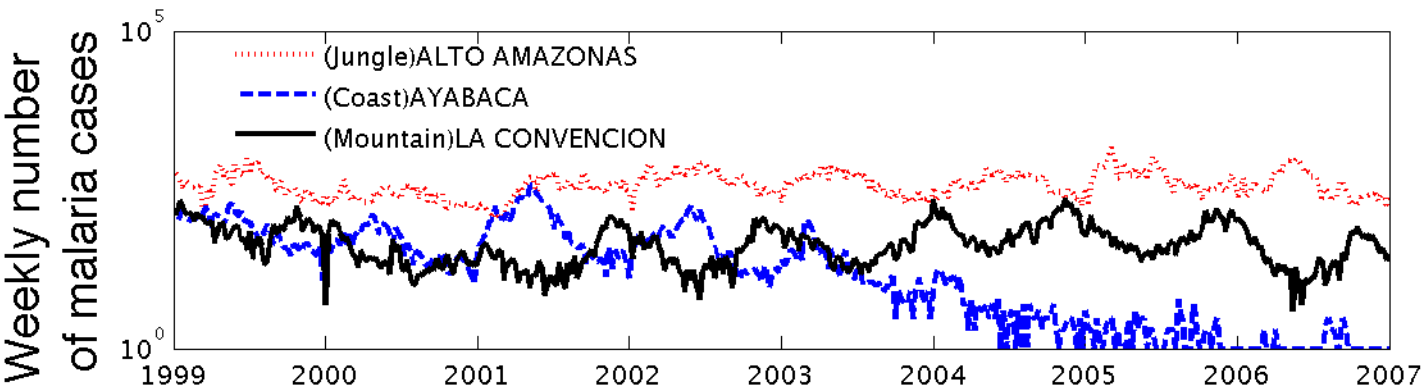

(Jungle)ALTO AMAZONAS

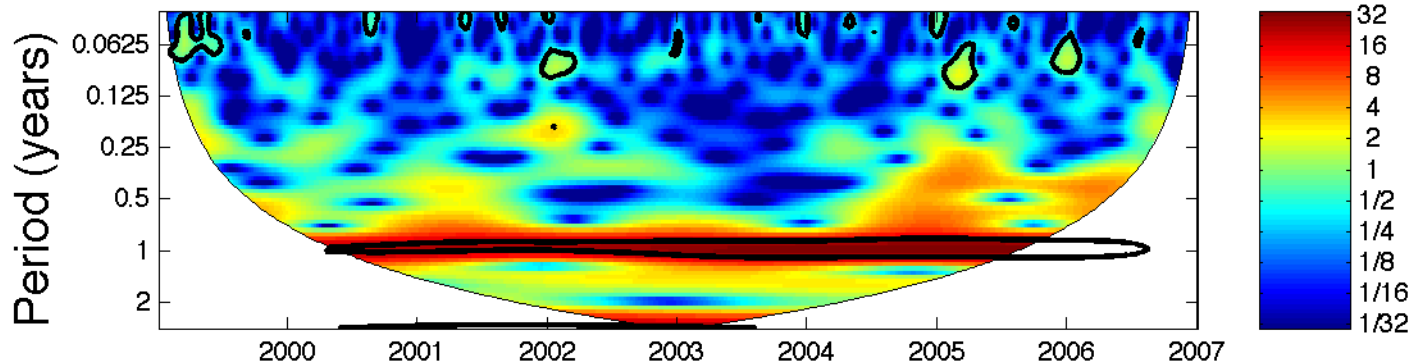

(Coast)AYABACA

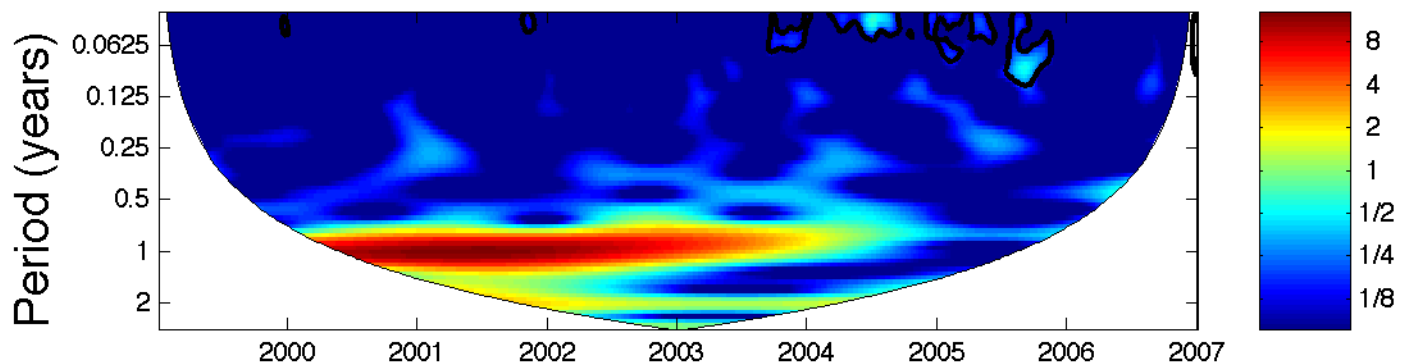

(Mountain)LA CONVENCION

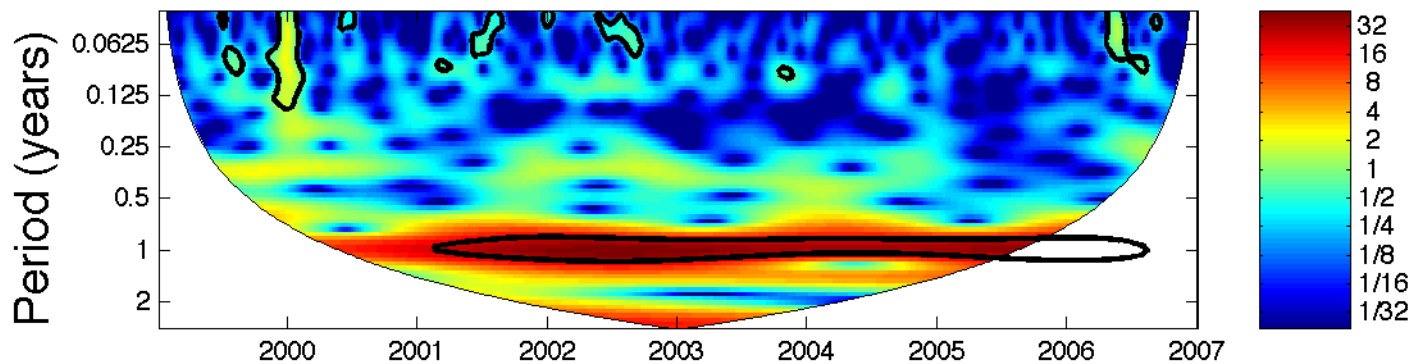

Time (years)

Supplement: MOESM15 [file 9548478]
